# Supplementary material
Source: Springer Nature journal article supplement (https://www.springermedizin.de/resource/supplementary/12916_2012_655_MOESM1_ESM.pdf/9598284)

PDD Blue ALA (W)

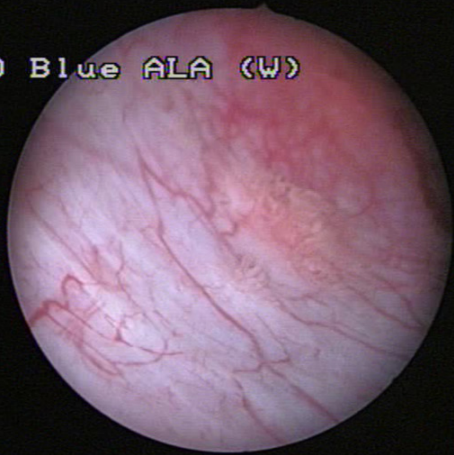

PDD Blue ALA (C)

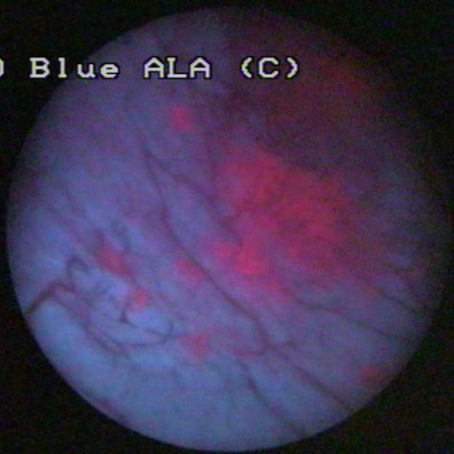

a

b

Supplement: MOESM1 [file 9598284]
